# Supplementary material for: Communication With Older Patients With Cancer Using Geriatric Assessment: A Cluster-Randomized Clinical Trial From the National Cancer Institute Community Oncology Research Program
Source: PubMed Central journal article supplement (PMC6865234; doi:10.1001/jamaoncol.2019.4728), 2019-11-07
Supplement: jamaoncol-6-196-s003.pdf [file jamaoncol-6-196-s003.pdf]

# Data Sharing Statement

Mohile. Communication With Older Patients With Cancer Using Geriatric Assessment. *JAMA Oncol.* Published November 07, 2019. 10.1001/jamaoncol.2019.4728

## Data

**Data available:** Yes

**Data types:** Deidentified participant data

**How to access data:** Supriya Mohile:

[supriya\\_mohile@urmc.rochester.edu](mailto:supriya_mohile@urmc.rochester.edu)

**When available:** With publication

## Supporting Documents

**Document types:** None

## Additional Information

**Who can access the data:** Researchers whose proposed use of the data has been approved

**Types of analyses:** for any purpose

**Mechanisms of data availability:** with investigator support, after approval of a proposal, and with a signed data access agreement

**Any additional restrictions:** This dataset will be available through a repository developed by the Cancer and Aging Research Group: [carg.org](http://carg.org)
